# Supplementary material for: Association of LTF, ENAM, and AMELX polymorphisms with dental caries susceptibility: a meta-analysis
Source: Springer Nature journal article supplement (doi:10.1186/s12903-020-01121-7), 2020-05-06
Supplement: MOESM1 [file 17959320]

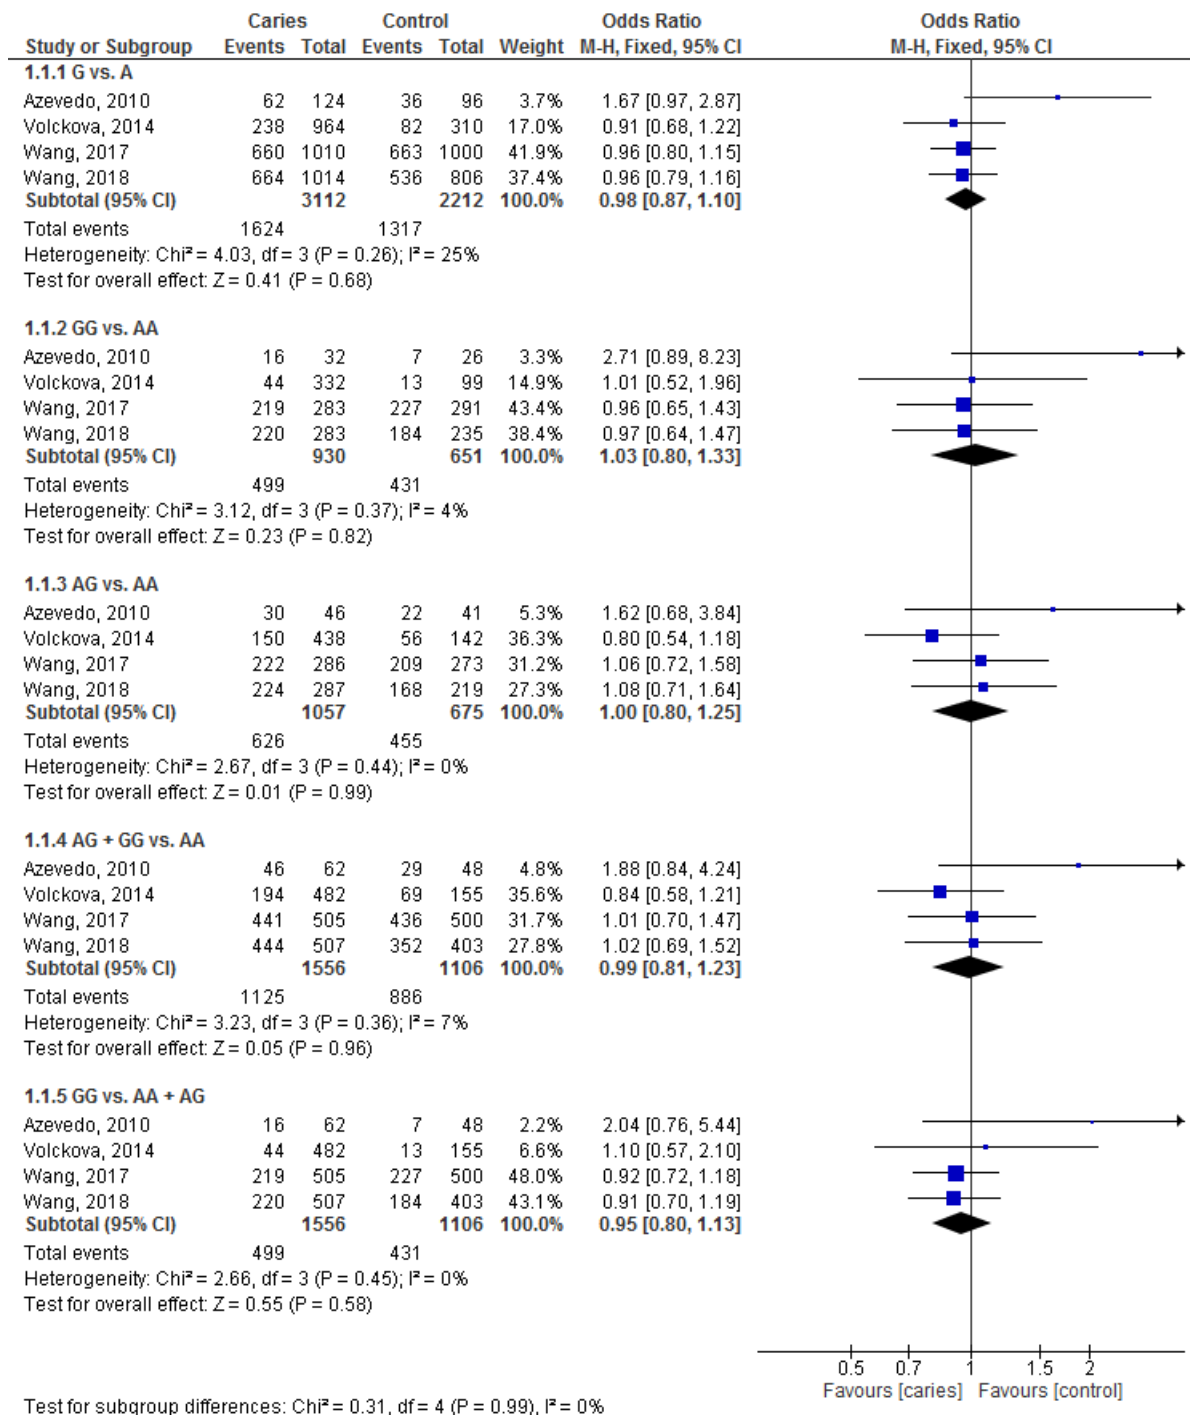

**Figure 1:** Forest plot of analysis of LTF rs1126478 polymorphism in high dental caries group compared to control group

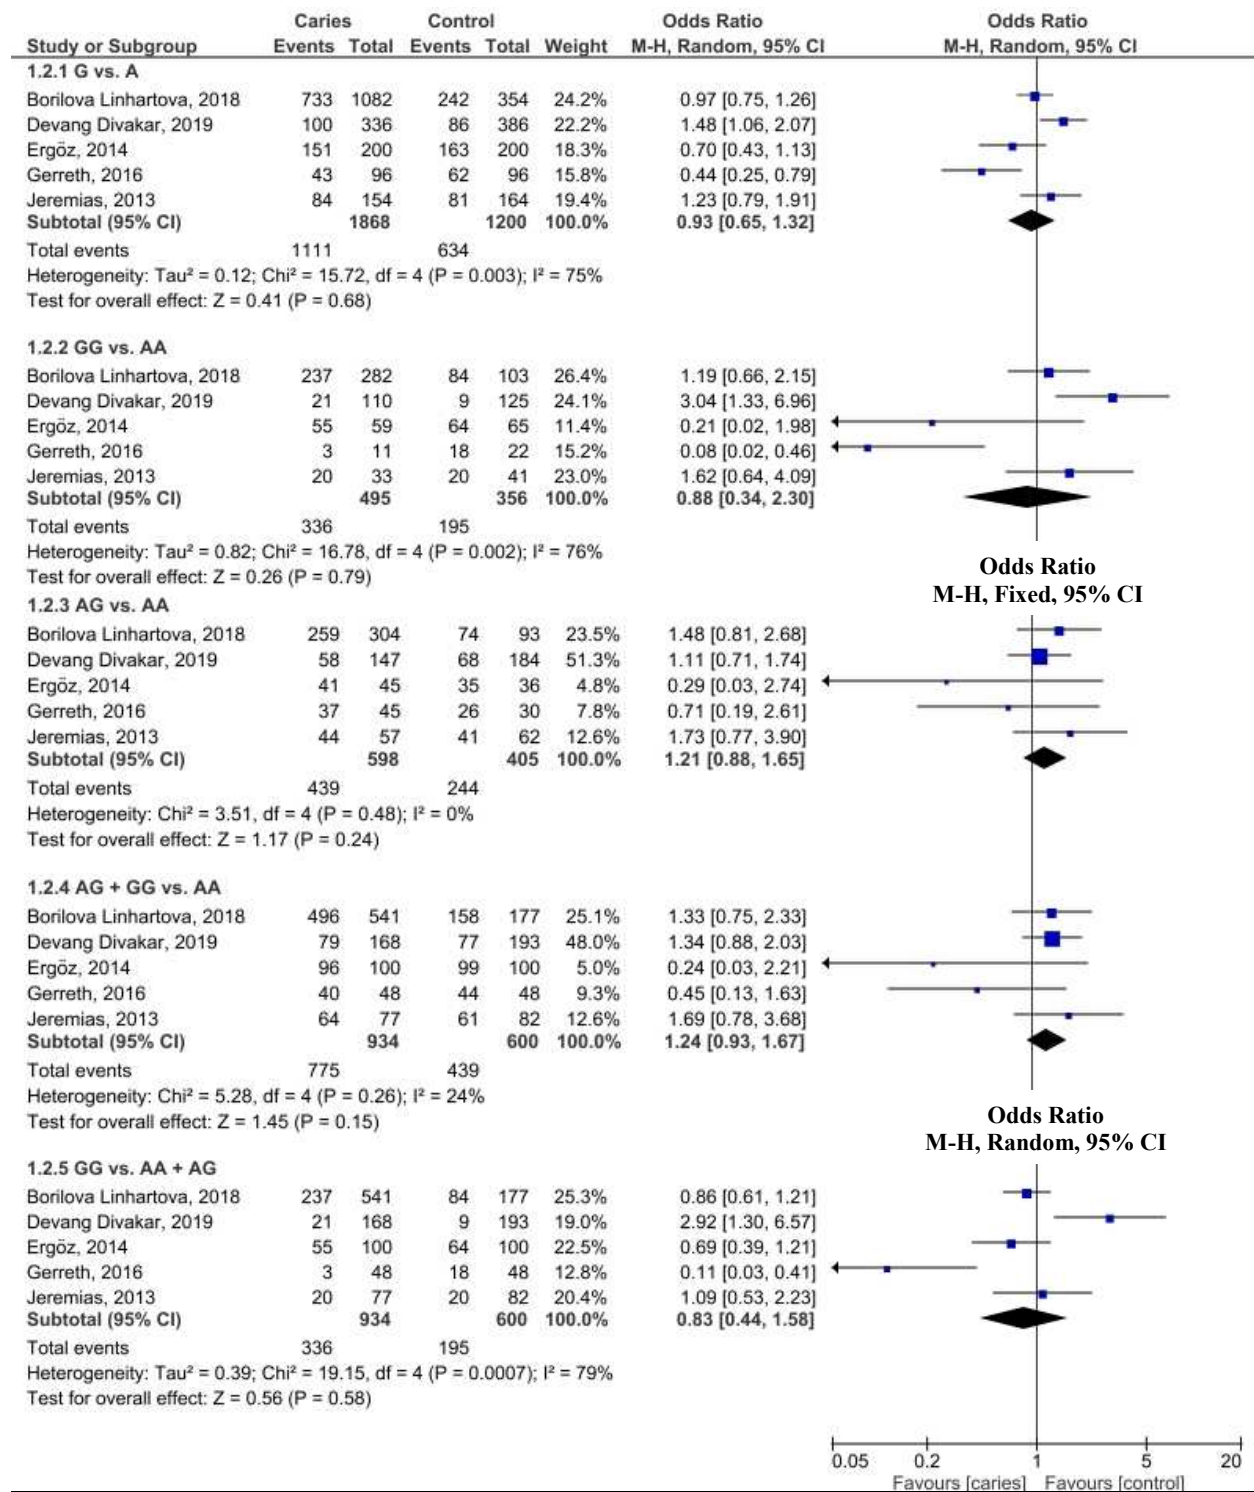

**Figure 2:** Forest plot of analysis of ENAM rs1264848 polymorphism in high dental caries group compared to control group

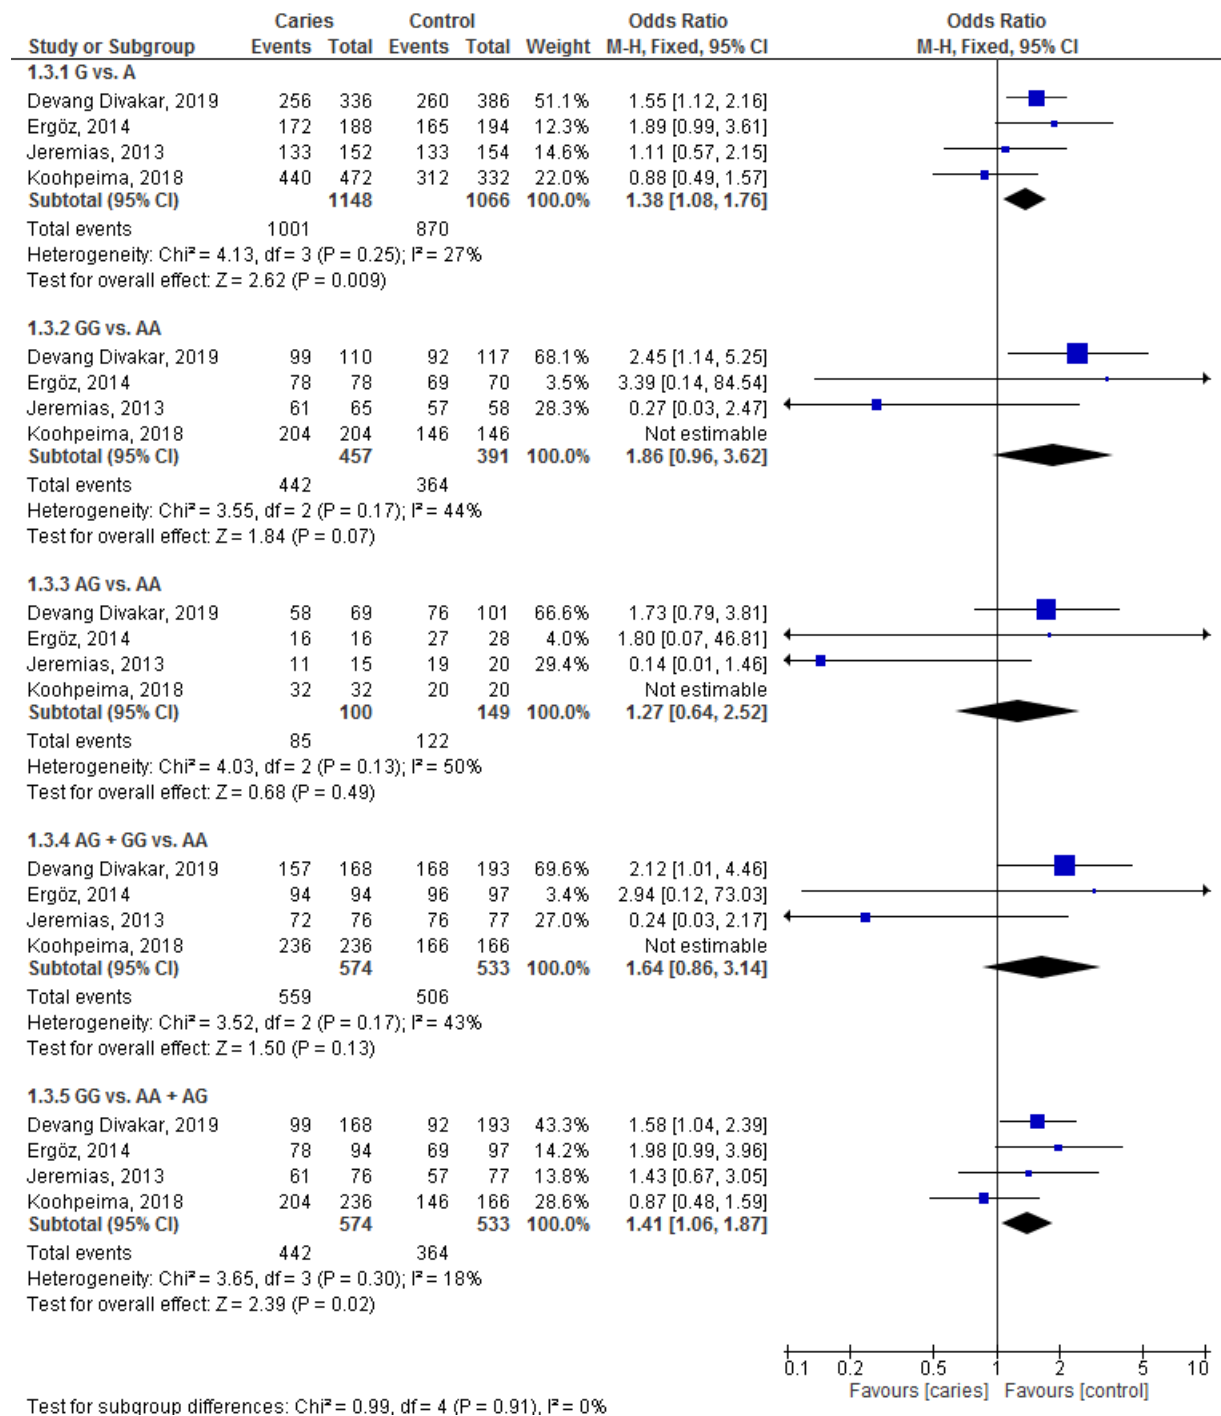

**Figure 3:** Forest plot of analysis of ENAM rs3796704 polymorphism in high dental caries group compared to control group

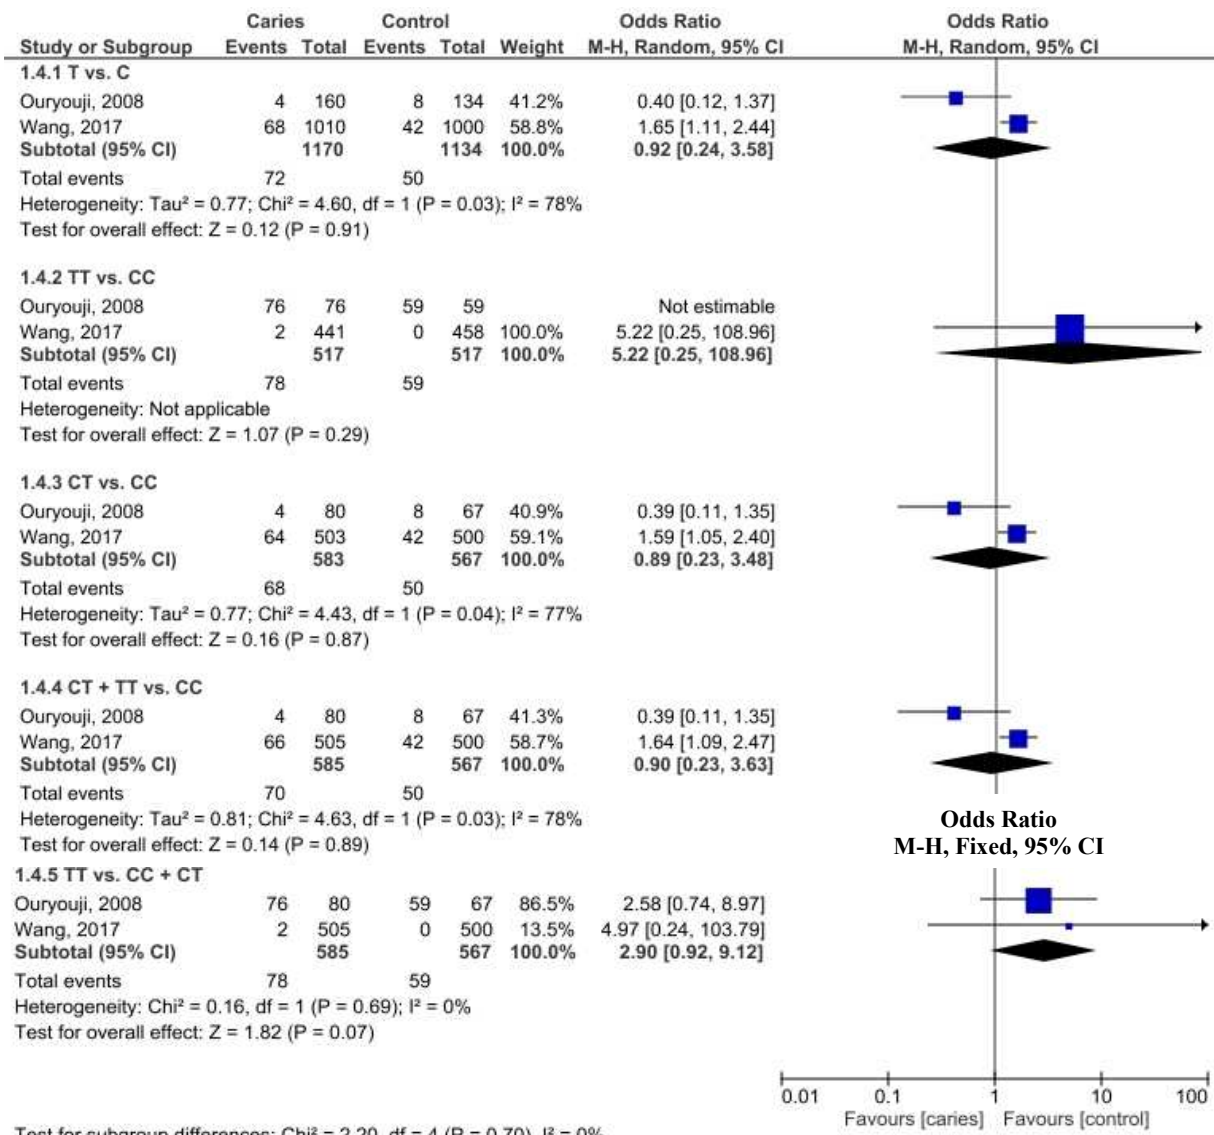

**Figure 4:** Forest plot of analysis of ENAM rs3796703 polymorphism in high dental caries group compared to control group

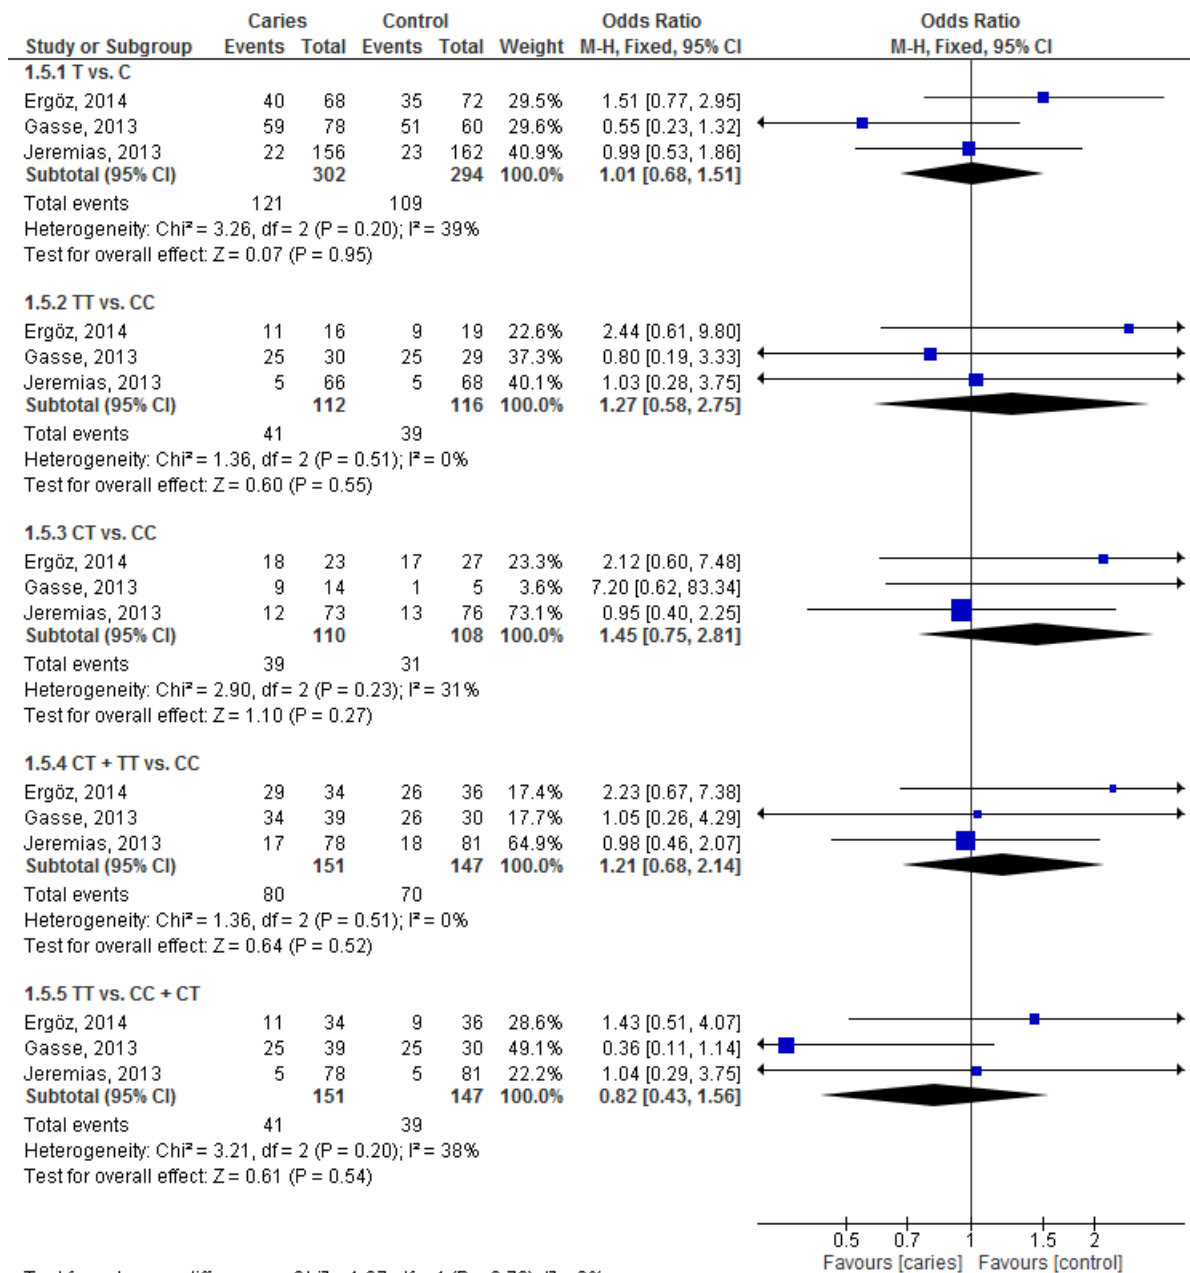

**Figure 5:** Forest plot of analysis of AMELX rs946252 polymorphism in high dental caries group compared to control group

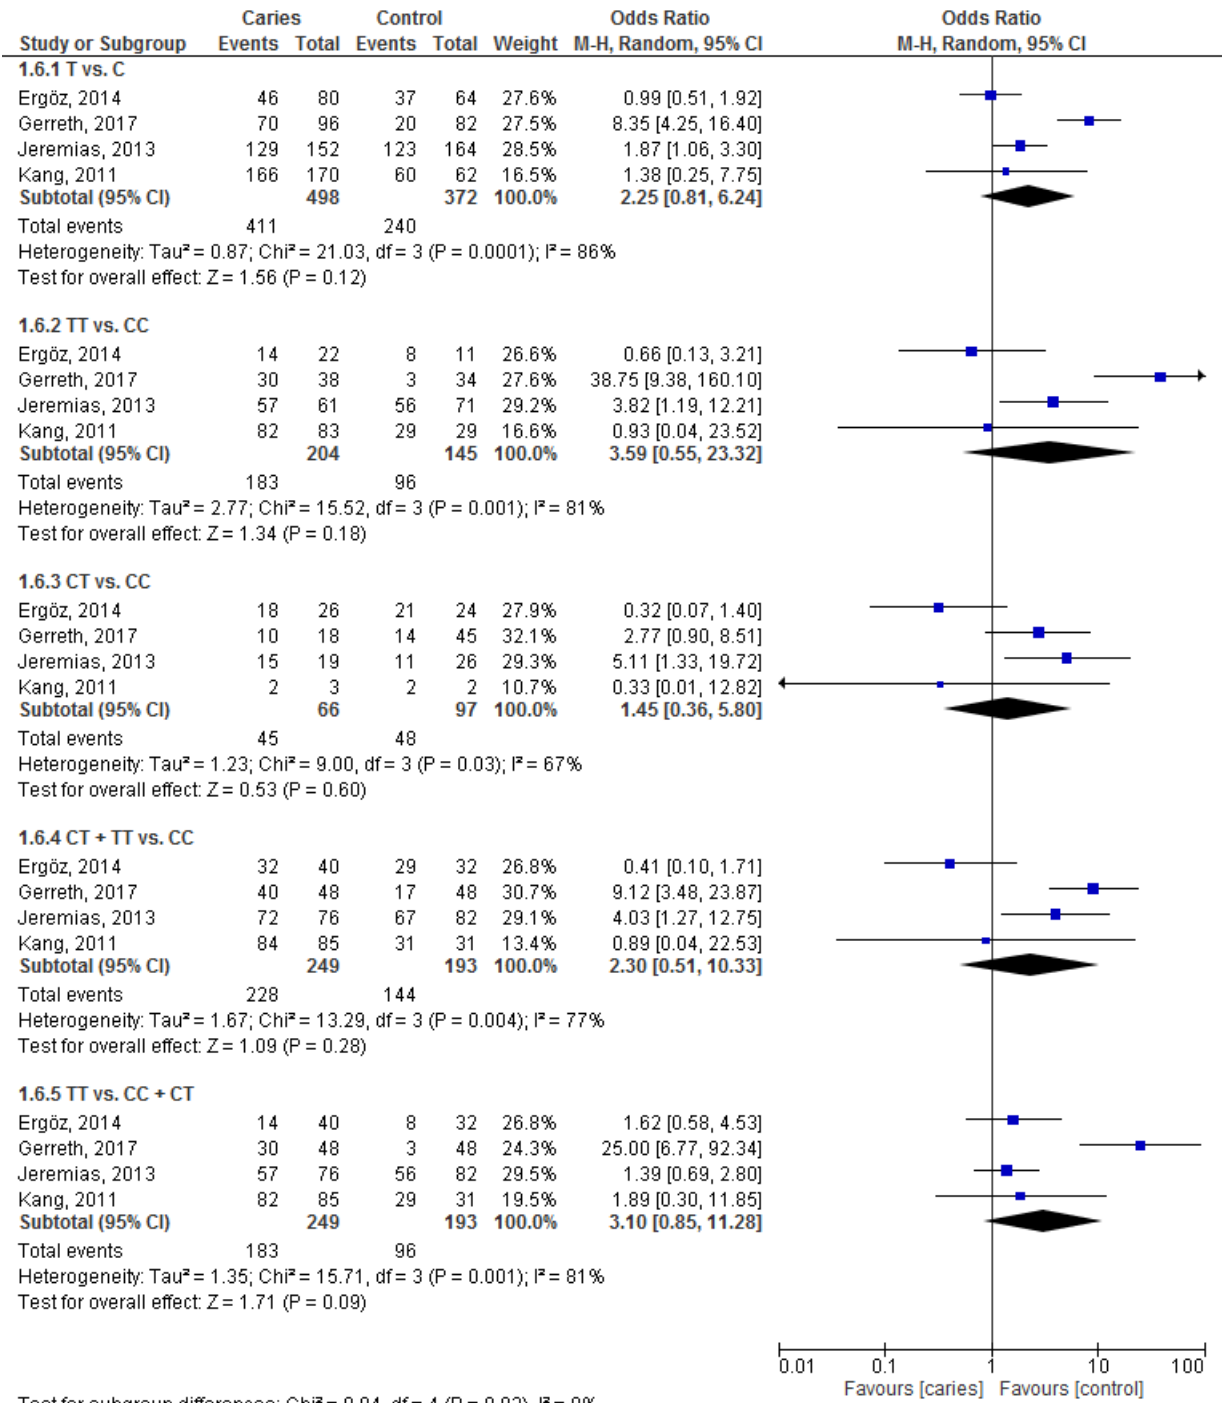

**Figure 6:** Forest plot of analysis of AMELX rs17878486 polymorphism in high dental caries group compared to control group

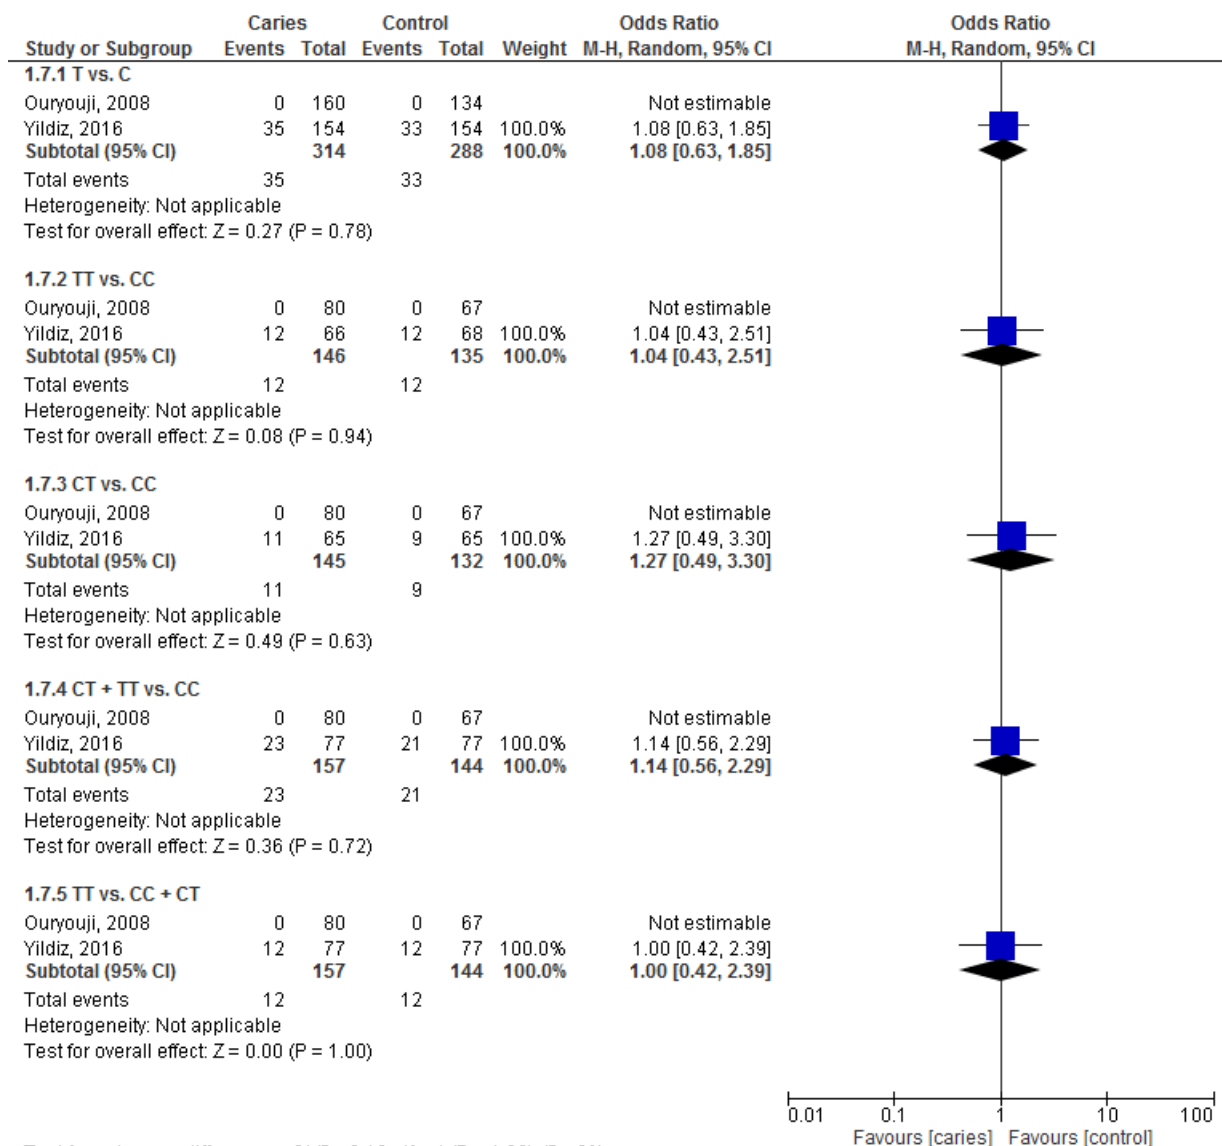

**Figure 7:** Forest plot of analysis of AMELX rs6639060 polymorphism in high dental caries group compared to control group

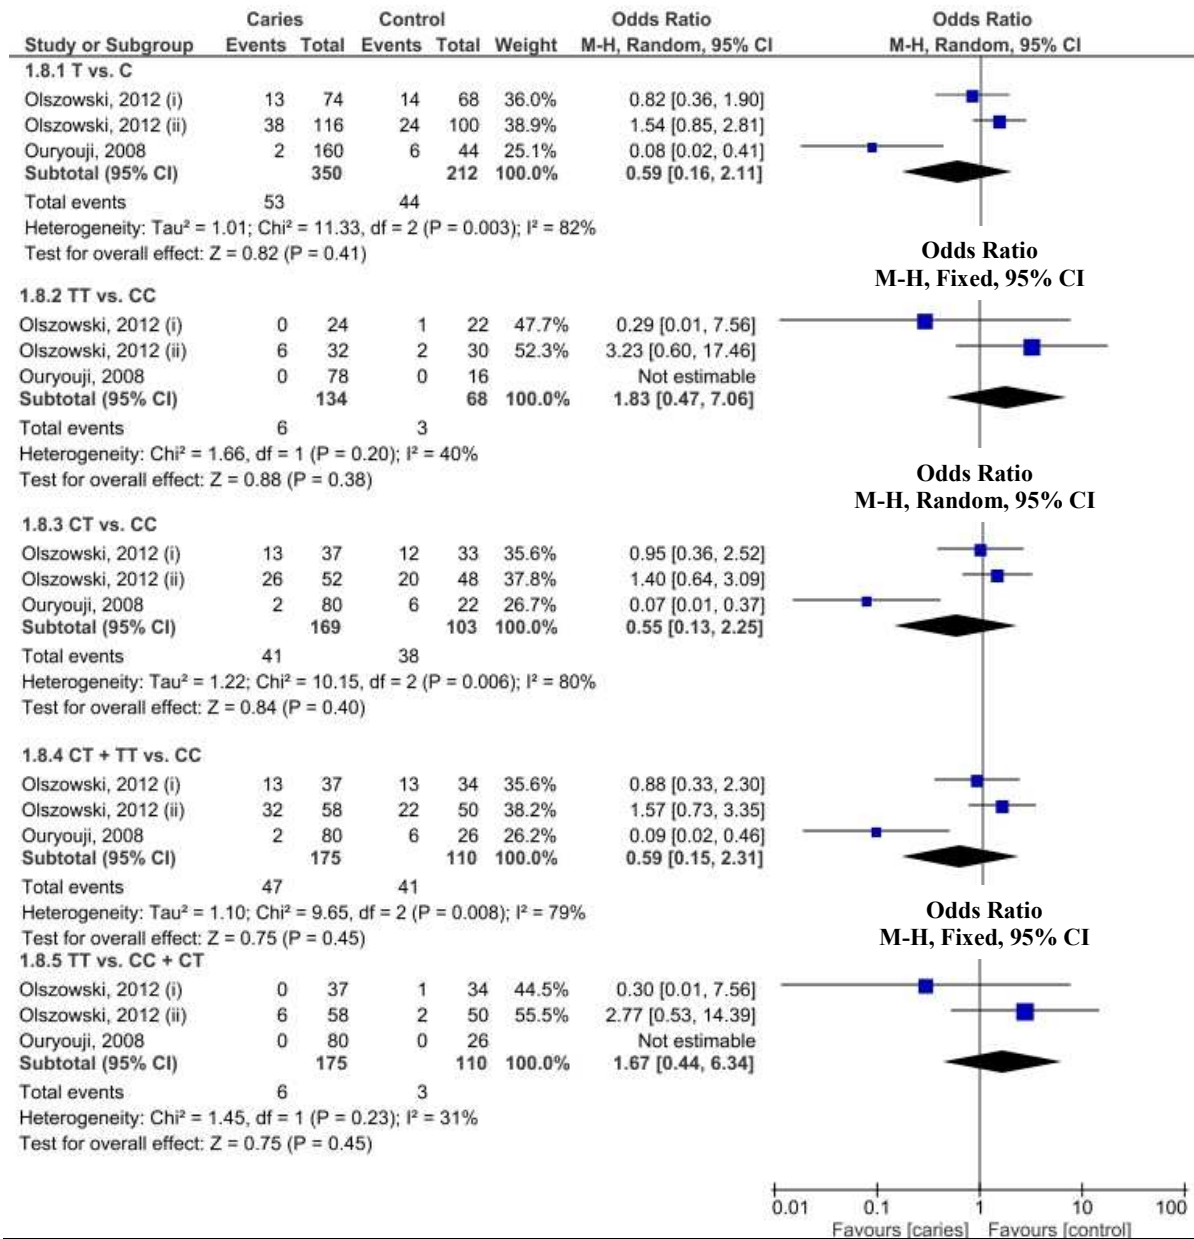

**Figure 8:** Forest plot of analysis of AMELX rs2106416 polymorphism in high dental caries group compared to control group
